# Supplementary material for: A Behavioral Intervention to Improve Obstetrical Care
Source: Atypon-hosted journal article supplement (doi:10.1056/nejmsa071456), 2008-04-30
Supplement: nejm_althabe_1929sa1.pdf [file nejm_althabe_1929sa1.pdf]

## Supplementary Appendix

This appendix has been provided by the authors to give readers additional information about their work.

Supplement to: Althabe F, Buekens P, Bergel E, et al. A behavioral intervention to improve obstetrical care. *N Engl J Med* 2008;358:1929-40.

Web table 1. Components of the Intervention

---

### **Selection of opinion leaders**

- Teams of 3-6 birth attendants per hospital
- Selected by peer nomination

### **Guidelines development workshops (5 days)**

- To learn the need of an evidence based clinical practice and how to critically appraise medical literature
- To develop simple evidence based guidelines about episiotomy use and management of the third stage of labor
- To identify the barriers for the adoption of those guidelines at the hospital level
- To learn how to conduct academic visits to disseminate guidelines
- To adapt and organize the dissemination and implementation activities in their hospitals

### **Academic detailing**

- Dissemination of the guidelines to hospital birth attendants through personal visits
- Identification of barriers to implement the guidelines
- Adaptation and organization of implementation activities to birth attendants' opinions.

### **Training on clinical management skills for delivery care**

- One day workshop at each hospital for opinion leaders.
- Training in manual skills with videos, anatomical models and patients.

### **Reminders**

- Placing reminders of the recommended practices in labor and delivery wards, clinical records, and surgical packages.

### **Audit & feed back**

- Monthly reports of hospital episiotomy and active management rates to be distributed to every birth attendant.

### **Information technology**

- Each hospital received a computer, all the intervention materials, developed guidelines, and the WHO Reproductive Health Library and Clinical Evidence as sources of evidence-based interventions for pregnancy and delivery care

### **Coordination**

- A regional coordinator met once a month with each team of opinion leaders to assess whether the components were completed as planned.
-

**Web table 2.** Compliance with the intervention and process measures

| <b>Components and process measures</b>                                | <b>n or [median %]</b> | <b>Range</b> |
|-----------------------------------------------------------------------|------------------------|--------------|
| <b>Selection of Opinion Leaders</b>                                   |                        |              |
| Health care providers (range of number per hospital)                  | 351                    | (18 - 67)    |
| - Health care providers that nominated opinion leaders                | [92]                   | (89 - 100)   |
| - Nominated opinion leaders that accepted to participate              | [83]                   | (67 - 100)   |
| Opinion Leaders in teams (range of number per hospital)               | 53                     | (3 - 6)      |
| Midwives                                                              | 15                     | (1-3)        |
| OB specialists                                                        | 26                     | (2 -5)       |
| OB residents                                                          | 8                      | (1 - 2)      |
| OB head of departament                                                | 4                      | (0 - 1)      |
| <b>Guidelines development workshops</b>                               |                        |              |
| Opinion leaders present                                               | [100]                  | (50 - 100)   |
| Agreement with the developed guidelines                               |                        |              |
| - Management of the third stage                                       | [100]                  | (95 - 100)   |
| - Use of episiotomy                                                   | [100]                  | (80 - 100)   |
| <b>Dissemination of the Guidelines</b>                                |                        |              |
| Birth attendants (range of number per hospital)                       | 308                    | (16 - 46)    |
| - Received the guidelines                                             | [100]                  | (100 - 100)  |
| - Received at least one academic visit                                | [100]                  | (79 - 100)   |
| Birth attendants' attitudes towards the guidelines                    |                        |              |
| - Resistent to implement                                              | [5]                    | (0 - 21)     |
| - Open to implement under certain conditions                          | [38]                   | (12 - 52)    |
| - Open to implement withouth conditions                               | [50]                   | (18 - 88)    |
| <b>Clinical management skills for delivery care workshop</b>          |                        |              |
| - Opinion leaders that received the training                          | [100]                  | (67 - 100)   |
| - Hospital birth attendants that received the training                | [100]                  | (100 - 100)  |
| <b>Implementation and maintenance of guidelines</b>                   |                        |              |
| Monthly reports distributed to birth attendants                       | 7                      | (3 - 10)     |
| Hospitals with reminders placed in: (n/hospitals where was available) |                        |              |
| - labor and delivery wards                                            | 10/10                  |              |
| - surgical packages                                                   | 5/10                   |              |
| - partograph                                                          | 1/1                    |              |
| <b>Coordination visits</b>                                            |                        |              |
| Monthly visits                                                        | 11                     | (6 - 15)     |
